# Supplementary material for: Molecular Mechanisms Involved in the Chemical Instability of ONC201 and Methods to Counter Its Degradation in Solution
Source: MDPI journal article supplement (doi:10.3390/pharmaceutics15102371), 2023-09-22
Supplement: s1 [file s1]

# Molecular Mechanisms Involved in the Chemical Instability of ONC201 and Methods to Counter Its Degradation in Solution

Maxime Annereau <sup>1,2</sup>, Marina Vignes <sup>1,2</sup>, Lucas Denis <sup>2</sup>, André Rieutord <sup>2</sup>, François-Xavier Legrand <sup>3</sup>, François Rioblanc <sup>2</sup>, Muriel Paul <sup>4,5</sup>, Jacques Grill <sup>6,7</sup>, Philippe-Henri Secretan <sup>8,\*</sup> and Bernard Do <sup>1,4</sup>

<sup>1</sup> Université Paris-Saclay, 91400 Orsay, France; maxime.annereau@gustaveroussy.fr (M.A.);

marina.vignes@gustaveroussy.fr (M.V.); bernard.do@aphp.fr (B.D.)

<sup>2</sup> Clinical Pharmacy Department, Gustave Roussy Cancer Campus, 94800 Villejuif, France; lucas.denis@gustaveroussy.fr (L.D.); andre.rieutord@gustaveroussy.fr (A.R.); francois.rioblanc@gustaveroussy.fr (F.R.)

<sup>3</sup> Université Paris-Saclay, CNRS, Institut Galien Paris-Saclay, 91400, Orsay, France; francois-xavier.legrand@universite-paris-saclay.fr

<sup>4</sup> Department of Pharmacy, Henri Mondor Hospital, AP-HP, 94000 Creteil, France; muriel.paul@aphp.fr

<sup>5</sup> EpidermE, Université Paris Est Creteil, 94000 Creteil, France

<sup>6</sup> Molecular Predictors and New Targets in Oncology, INSERM, Gustave Roussy, Université Paris-Saclay, 94800 Villejuif, France; jacques.grill@gustaveroussy.fr

<sup>7</sup> Département de Cancérologie de l'Enfant et de l'Adolescent, Gustave Roussy, Université Paris-Saclay, 94800 Villejuif, France

<sup>8</sup> Université Paris-Saclay, Matériaux et Santé, 91400 Orsay, France

\* Correspondence: philippe-henri.secretan@universite-paris-saclay.fr

## Table of contents

|                       |   |
|-----------------------|---|
| List of table .....   | 3 |
| List of figures ..... | 3 |

## List of table

|                                                                                                                                                                                                                                      |   |
|--------------------------------------------------------------------------------------------------------------------------------------------------------------------------------------------------------------------------------------|---|
| Table S1: Z matrix of the optimized conformer of $[\text{ONC201}+2\text{H}]^{2+}$ .....                                                                                                                                              | 4 |
| Table S2: Z matrix of the optimized conformer of ONC201 .....                                                                                                                                                                        | 5 |
| Table S3: pH of aqueous solutions ONC201 in the presence of $\text{H}_2\text{O}_2$ (0.3%) and after pH adjustment or addition of ascorbic acid, sulphites and N-acetylcystein (final concentration: $0.5 \text{ mg.mL}^{-1}$ ) ..... | 7 |

## List of figures

|                                                                                                                                                                          |   |
|--------------------------------------------------------------------------------------------------------------------------------------------------------------------------|---|
| Figure S1: results of the conformational analysis of $[\text{ONC201}+2\text{H}]^{2+}$ (inset a) and of ONC201 (inset b) .....                                            | 7 |
| Figure S2: ALIE values (in $\text{kcal.mol}^{-1}$ ) of the 4 nitrogen atoms of ONC201 .....                                                                              | 7 |
| Figure S3: Mapped electrostatic potential of study of the acid form of ONC201 and colour scale. Maximal and minimal MEP values are given in $\text{kcal.mol}^{-1}$ ..... | 8 |

Table S1: Z matrix of the optimized conformer of [ONC201+2H]<sup>2+</sup>

| Atom | x-coordinate   | y-coordinate    | z-coordinate    |
|------|----------------|-----------------|-----------------|
| O1   | 2.996860000000 | -4.525889000000 | 8.841160000000  |
| N2   | 4.820234000000 | -4.374686000000 | 12.409933000000 |
| N3   | 6.564560000000 | -2.250066000000 | 9.317902000000  |
| N4   | 3.130012000000 | -5.251101000000 | 11.006960000000 |
| C5   | 5.286117000000 | -3.554184000000 | 11.420264000000 |
| C6   | 4.712894000000 | -3.598360000000 | 10.183622000000 |
| C7   | 6.441038000000 | -2.645047000000 | 11.729659000000 |
| C8   | 5.222524000000 | -2.760759000000 | 9.038275000000  |
| C9   | 6.616332000000 | -1.596368000000 | 10.626448000000 |
| C10  | 3.737306000000 | -5.232943000000 | 12.247696000000 |
| C11  | 3.575915000000 | -4.459779000000 | 9.932397000000  |
| C12  | 7.119823000000 | -1.442682000000 | 8.217893000000  |
| C13  | 6.379881000000 | -0.150296000000 | 7.909899000000  |
| C14  | 5.346451000000 | -0.126077000000 | 6.963828000000  |
| C15  | 6.674418000000 | 1.028730000000  | 8.608060000000  |
| C16  | 4.617904000000 | 1.041154000000  | 6.727641000000  |
| C17  | 5.947896000000 | 2.197876000000  | 8.377055000000  |
| C18  | 4.914862000000 | 2.206310000000  | 7.437293000000  |
| C19  | 4.366663000000 | -5.610218000000 | 14.339449000000 |
| N20  | 3.398467000000 | -5.937815000000 | 13.273048000000 |
| C21  | 1.994000000000 | -6.165138000000 | 10.771170000000 |
| C22  | 2.412618000000 | -7.421192000000 | 10.026162000000 |
| C23  | 3.388881000000 | -8.243151000000 | 10.606986000000 |
| C24  | 3.833700000000 | -9.400214000000 | 9.970289000000  |
| C25  | 3.292600000000 | -9.749168000000 | 8.732228000000  |
| C26  | 2.314894000000 | -8.940473000000 | 8.153115000000  |
| C27  | 1.857548000000 | -7.771558000000 | 8.779421000000  |
| C28  | 0.801410000000 | -6.925209000000 | 8.104492000000  |
| C29  | 5.225418000000 | -4.418675000000 | 13.824517000000 |
| H31  | 6.282659000000 | -2.152061000000 | 12.695083000000 |
| H32  | 7.350194000000 | -3.251710000000 | 11.827405000000 |
| H33  | 4.497820000000 | -1.951379000000 | 8.829003000000  |
| H34  | 5.257982000000 | -3.374532000000 | 8.130301000000  |
| H35  | 7.587840000000 | -1.108170000000 | 10.743017000000 |
| H36  | 5.845131000000 | -0.813583000000 | 10.734540000000 |
| H37  | 8.160580000000 | -1.218236000000 | 8.476009000000  |
| H38  | 7.133412000000 | -2.077712000000 | 7.324807000000  |
| H39  | 5.114583000000 | -1.029923000000 | 6.406270000000  |
| H40  | 7.481775000000 | 1.031234000000  | 9.335463000000  |
| H41  | 3.820676000000 | 1.041524000000  | 5.989914000000  |
| H42  | 6.189702000000 | 3.102490000000  | 8.927585000000  |
| H43  | 4.348524000000 | 3.115335000000  | 7.256329000000  |
| H44  | 3.846070000000 | -5.354415000000 | 15.266934000000 |
| H45  | 4.993623000000 | -6.485624000000 | 14.547797000000 |
| H46  | 1.593844000000 | -6.416942000000 | 11.754108000000 |
| H47  | 1.239630000000 | -5.604861000000 | 10.223366000000 |

|     |                   |                    |                   |
|-----|-------------------|--------------------|-------------------|
| H48 | 3.79912700000000  | -7.96510000000000  | 11.57356600000000 |
| H49 | 4.59254800000000  | -10.02230600000000 | 10.43628000000000 |
| H50 | 3.62774000000000  | -10.64616700000000 | 8.21908700000000  |
| H51 | 1.89636600000000  | -9.21588700000000  | 7.18843500000000  |
| H52 | 1.15768300000000  | -5.89880800000000  | 7.97486600000000  |
| H53 | -0.12085100000000 | -6.88193800000000  | 8.69451300000000  |
| H54 | 0.54719300000000  | -7.33242700000000  | 7.12316400000000  |
| H57 | 6.30023900000000  | -4.58673400000000  | 13.91479800000000 |
| H56 | 4.97238400000000  | -3.47350800000000  | 14.31535600000000 |

Table S2: Z matrix of the optimized conformer of ONC201

| Atom | x-coordinate     | y-coordinate      | z-coordinate      |
|------|------------------|-------------------|-------------------|
| O1   | 3.09076000000000 | -4.61607600000000 | 8.77984600000000  |
| N2   | 4.76684300000000 | -4.33166700000000 | 12.38983200000000 |
| N3   | 6.65857100000000 | -2.31222400000000 | 9.24895500000000  |
| N4   | 3.13491600000000 | -5.25099300000000 | 10.97700800000000 |
| C5   | 5.29079100000000 | -3.55536300000000 | 11.38545200000000 |
| C6   | 4.75991100000000 | -3.63975900000000 | 10.14040600000000 |
| C7   | 6.46016600000000 | -2.67705700000000 | 11.70509400000000 |
| C8   | 5.28426500000000 | -2.85240300000000 | 8.97349900000000  |
| C9   | 6.71124300000000 | -1.65360200000000 | 10.60481400000000 |
| C10  | 3.70158600000000 | -5.14451500000000 | 12.18900400000000 |
| C11  | 3.62896400000000 | -4.49969200000000 | 9.86749700000000  |
| C12  | 7.17660800000000 | -1.41340300000000 | 8.11475600000000  |
| C13  | 6.38869200000000 | -0.14523200000000 | 7.93345700000000  |
| C14  | 5.31770900000000 | -0.10173200000000 | 7.03215300000000  |
| C15  | 6.72743000000000 | 1.01036400000000  | 8.64711000000000  |
| C16  | 4.58107400000000 | 1.06958300000000  | 6.86723100000000  |
| C17  | 5.99055500000000 | 2.18109800000000  | 8.48350400000000  |
| C18  | 4.91305600000000 | 2.21072300000000  | 7.59757300000000  |
| C19  | 4.32564400000000 | -5.49853600000000 | 14.38664100000000 |
| N20  | 3.34755700000000 | -5.75114200000000 | 13.31266000000000 |
| C21  | 1.99180000000000 | -6.16274800000000 | 10.71048900000000 |
| C22  | 2.42485100000000 | -7.43013700000000 | 9.99749900000000  |
| C23  | 3.46200900000000 | -8.19612200000000 | 10.53985900000000 |
| C24  | 3.88574100000000 | -9.37076700000000 | 9.92515600000000  |
| C25  | 3.26109400000000 | -9.79116700000000 | 8.75171700000000  |
| C26  | 2.22575200000000 | -9.03329100000000 | 8.20987000000000  |
| C27  | 1.78916500000000 | -7.84658900000000 | 8.81309000000000  |
| C28  | 0.67157000000000 | -7.05189600000000 | 8.18075500000000  |
| C29  | 5.12738000000000 | -4.30697900000000 | 13.83058800000000 |
| H30  | 7.30340500000000 | -3.10732400000000 | 9.26832700000000  |
| H31  | 6.28826700000000 | -2.13495600000000 | 12.63737000000000 |
| H32  | 7.34276800000000 | -3.30664100000000 | 11.86291700000000 |
| H33  | 4.63640300000000 | -2.00346700000000 | 8.75285900000000  |
| H34  | 5.34616300000000 | -3.47831100000000 | 8.08387600000000  |
| H35  | 7.69438000000000 | -1.20318500000000 | 10.71933000000000 |

|     |                   |                    |                   |
|-----|-------------------|--------------------|-------------------|
| H36 | 5.95301600000000  | -0.87277100000000  | 10.60394000000000 |
| H37 | 8.21579600000000  | -1.21170000000000  | 8.37067300000000  |
| H38 | 7.14918800000000  | -2.03812900000000  | 7.22282800000000  |
| H39 | 5.06298900000000  | -0.98361000000000  | 6.45454700000000  |
| H40 | 7.57141600000000  | 0.99834000000000   | 9.32711800000000  |
| H41 | 3.75374100000000  | 1.09151100000000   | 6.16764900000000  |
| H42 | 6.26047600000000  | 3.06949400000000   | 9.04243900000000  |
| H43 | 4.34041000000000  | 3.12225700000000   | 7.46995700000000  |
| H44 | 3.81457500000000  | -5.25408400000000  | 15.31481400000000 |
| H45 | 4.94809200000000  | -6.38311900000000  | 14.52821300000000 |
| H46 | 1.50427100000000  | -6.38288600000000  | 11.65932400000000 |
| H47 | 1.28367300000000  | -5.58842900000000  | 10.12211700000000 |
| H48 | 3.95325800000000  | -7.87535500000000  | 11.45291400000000 |
| H49 | 4.69224200000000  | -9.95045600000000  | 10.35979300000000 |
| H50 | 3.57843200000000  | -10.70345200000000 | 8.25919700000000  |
| H51 | 1.74566800000000  | -9.36327300000000  | 7.29418800000000  |
| H52 | 0.33609700000000  | -7.52623000000000  | 7.25700900000000  |
| H53 | 1.00192200000000  | -6.03670900000000  | 7.94294500000000  |
| H54 | -0.19320200000000 | -6.97082800000000  | 8.84688600000000  |
| H57 | 6.19999300000000  | -4.43026300000000  | 13.95496400000000 |
| H56 | 4.80610300000000  | -3.35589100000000  | 14.25608200000000 |
| H58 | 2.66152200000000  | -6.48769500000000  | 13.37141900000000 |

---

Table S3: pH of aqueous solutions ONC201 in the presence of H<sub>2</sub>O<sub>2</sub> (0.3%) and after pH adjustment or addition of ascorbic acid, sulphites and N-acetylcystein (final concentration: 0.5 mg.mL<sup>-1</sup>)

| Condition | Aqueous ONC201 | Solution adjusted to pH=6 | Ascorbic acid | Sulphite | N-acetylcystein |
|-----------|----------------|---------------------------|---------------|----------|-----------------|
| pH value  | 4.1            | 6.0                       | 4.5           | 7.2      | 4.2             |

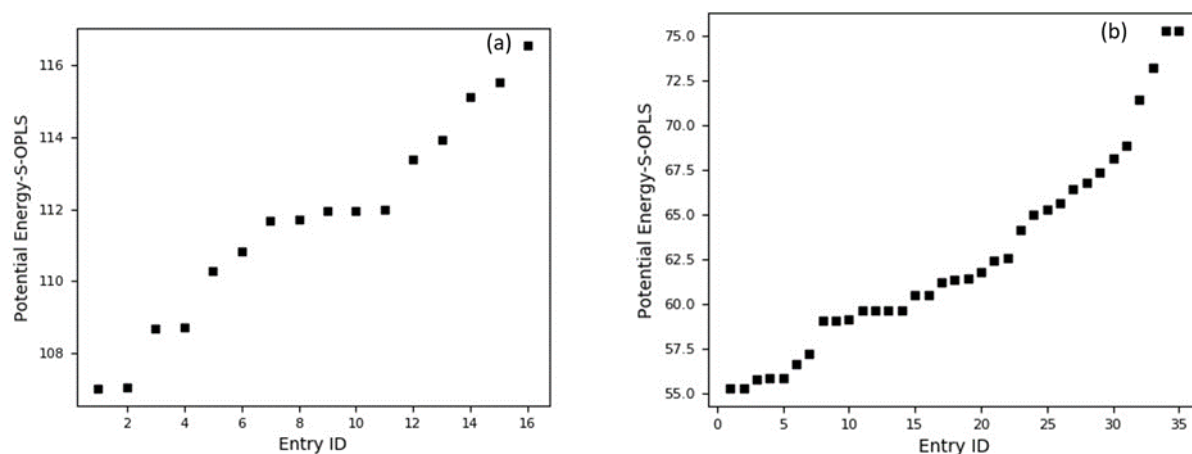

Figure S1: results of the conformational analysis of [ONC201+2H]<sup>2+</sup> (inset a) and of ONC201 (inset b)

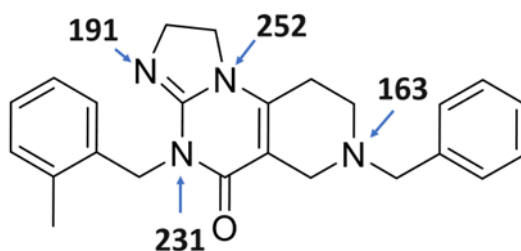

Figure S2: ALIE values (in kcal.mol<sup>-1</sup>) of the 4 nitrogen atoms of ONC201

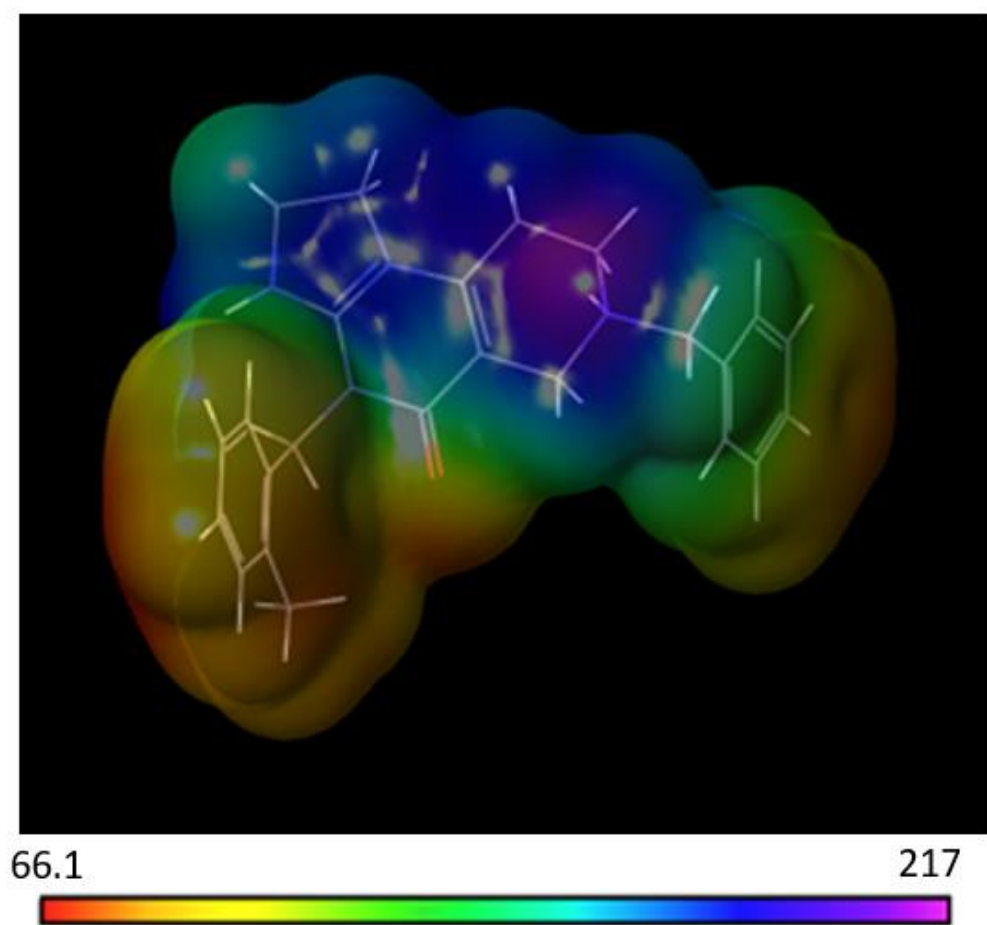

Figure S3: Mapped electrostatic potential of study of the acid form of ONC201 and colour scale. Maximal and minimal MEP values are given in kcal.mol<sup>-1</sup>
